# Supplementary material for: Enhanced microwave absorption performance of Fe3Al flakes by optimizing the carbon nanotube coatings
Source: Royal Society of Chemistry journal article supplement (doi:10.1039/d4ra00955j), 2024-01-01
Supplement: d4ra00955j1.pdf [file d4ra00955j1.pdf]

## Supporting Information

### **Enhanced microwave absorption performance of Fe<sub>3</sub>Al flakes by optimizing the carbon nanotube coatings**

Xixi Luo,<sup>\*a</sup> Hui Xie,<sup>\* a</sup> Jing Cao, <sup>a</sup> Yaru Lu, <sup>a, b</sup> Shiping Tao, <sup>a</sup> Zhixing Meng, <sup>a</sup> Lingna Pu, <sup>a</sup> Liyang Sun, <sup>a</sup> Pengjia He, <sup>a</sup> Ziyang Liu <sup>a</sup>

<sup>a</sup> School of Materials Engineering, Xi'an Aeronautical University, Xi'an 710077, China.

<sup>b</sup> School of Chemistry and Chemical Engineering, Northwestern Polytechnical University, Xi'an 710072, China

\*Corresponding authors, E-mail: luoxixi@xaau.edu.cn (X. Luo), xiehui@xaau.edu.cn (H. Xie)

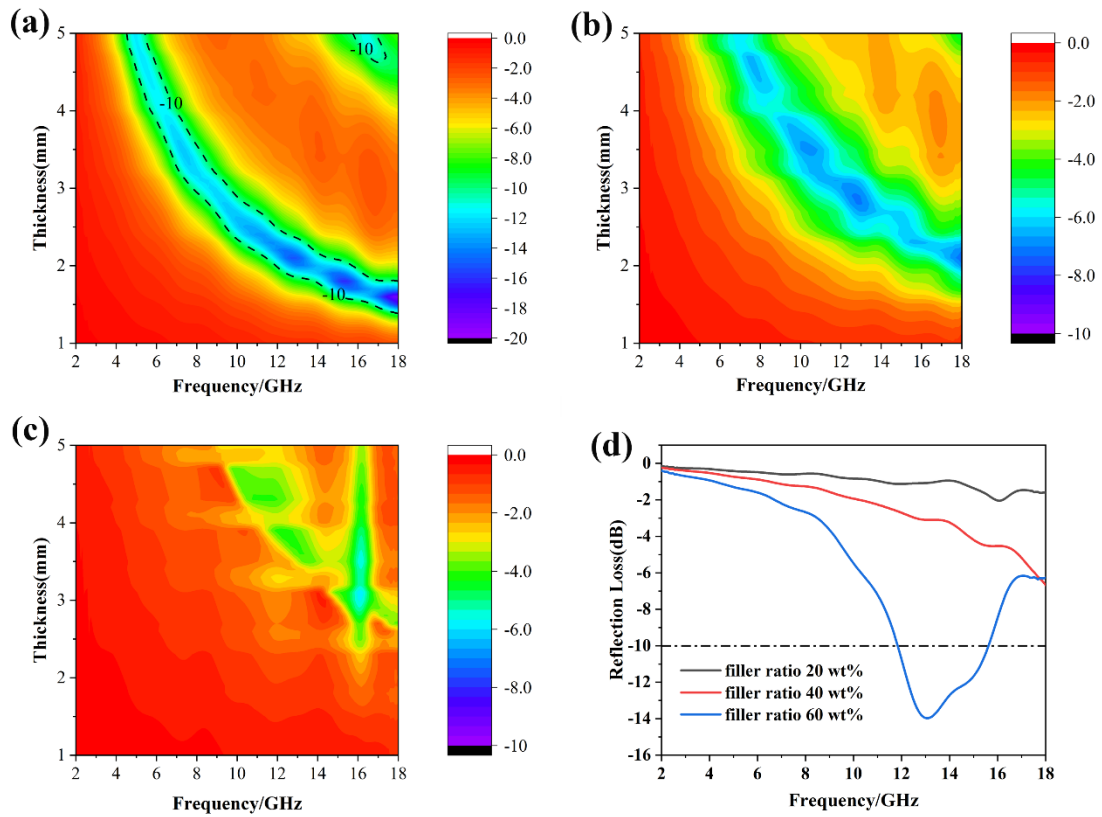

**Fig. S1.** Two-dimensional representation of the microwave reflection losses of the  $\text{Fe}_3\text{Al}-1.5\%\text{CNT}$  composite absorber with different filler ratios: (a) 60 wt%, (b) 40 wt%, (c) 20 wt%. (d) Microwave reflection loss of the  $\text{Fe}_3\text{Al}-1.5\%\text{CNT}$  composite absorbers (different filler ratios of 60 wt%, 40 wt%, and 20 wt%, respectively) with a thickness of 2 mm.
